# Supplementary material for: Stability analysis of the GAL regulatory network in Saccharomyces cerevisiae and Kluyveromyces lactis
Source: PubMed Central journal article supplement (PMC3009516; doi:10.1186/1471-2105-11-s1-s43), 2010-01-18
Supplement: 1471-2105-11-S1-S43-S1.pdf [file 1471-2105-11-S1-S43-S1.pdf]

**Proof:** At an equilibrium, the following equalities hold:

$$\begin{aligned}(K_3 - K_2)GalR - K_3R_0Gal - (K_3S_0 + K_1)R + R_0(K_3S_0 + 1) &= 0 \\ (K_3 - K_2)GalR + K_3S_0R_0 - K_3S_0R - K_3R_0Gal &= 0.\end{aligned}$$

The steady state solution is given by

$$R_{ss} = \frac{R_0}{K_1}, \quad Gal_{ss} = \frac{(K_3S_0 + K_1)\frac{R_0}{K_1} - R_0(K_3S_0 + 1)}{(K_3 - K_2)\frac{R_0}{K_1} - K_3S_0}.$$

So, the Jacobian at the steady state  $(R_{ss}, Gal_{ss})$  is given by

$$J = \begin{bmatrix} (K_3 - K_2)R_{ss} - K_3R_0 & (K_3 - K_2)Gal_{ss} - (K_3S_0 + K_1) \\ (K_3 - K_3)R_{ss} - K_3R_0 & (K_3 - K_2)Gal_{ss} - K_3S_0 \end{bmatrix}$$

As the Jacobian is non-singular for all values of the model parameters, it satisfies the implicit function theorem. As a result, the system cannot exhibit any steady state bifurcations and, therefore, does not exhibit bistability. Next, we investigate the presence of a Hopf bifurcation point that may lead to oscillatory solution or dynamic equilibrium. Now, the model exhibits Hopf bifurcation if and only if  $\text{trace}(J) = 0$  and  $\det(J) > 0$ . Hence, the given system has a Hopf bifurcation if and only if

$$(K_3 - K_2)R_{ss} - K_3R_0 + (K_3 - K_2)Gal_{ss} - K_3S_0 = 0, \quad \text{and} \quad ((K_3 - K_1)R_{ss} - K_3R_0)K_1 > 0.$$

Since  $K_1$  is positive, a Hopf bifurcation exists if and only if

$$(K_3 - K_2)R_{ss} - K_3R_0 = -[(K_3 - K_2)Gal_{ss} - K_3S_0] > 0 \quad \Rightarrow \quad (K_3 - K_2)Gal_{ss} < K_3S_0.$$

After simplifying the above equations, we get

$$\frac{K_3}{K_2K_1} \left(1 - \frac{S_0}{R_1}\right) > 1. \tag{6}$$

Hence, Hopf bifurcation exists if and only if (6) holds together with the following equation:

$$\left[(K_3 - K_2)\frac{R_0}{K_1} - K_3R_0\right]^2 + K_2K_3S_0R_0 = 0.$$

Since all parameters are strictly positive and since  $R_0$ , the initial quantity of GAL4p, and  $S_0$ , the initial quantity of galactose, are non-zero quantities (see [4]), the above condition cannot be satisfied. Therefore, Hopf bifurcation does not exist for  $\mathcal{S}_L$ . QED.  $\square$
